# Supplementary material
Source: Springer Nature journal article supplement (https://www.springermedizin.de/resource/supplementary/12889_2014_7481_MOESM1_ESM.pdf/9497534)
Supplement: MOESM1 [file 9497534]

Additional File 1: Statements presented to employees during interviews

|                                                                    |
|--------------------------------------------------------------------|
| My health is none of Arbouw's concern.                             |
| I'm entitled to this treatment.                                    |
| My wife thinks it's important I participate.                       |
| I know somebody with cardiovascular disease.                       |
| Nobody else at work does anything about it either.                 |
| On the construction site, all you can get is French fries anyway.  |
| If I sign up, I'll worry about my employer finding out.            |
| If I sign up, people will think there's something wrong with me.   |
| My employer thinks it's important I participate.                   |
| It's no use; I cannot get myself to do it.                         |
| It's no use; I won't be able to keep it up.                        |
| I'm not a big talker.                                              |
| I want to keep working a little longer.                            |
| After work, I simply don't have the energy.                        |
| My health complaints are bothering me.                             |
| Six months; that's way too long.                                   |
| Forty-five minutes; I cannot spare that much time.                 |
| I simply enjoy good food.                                          |
| I'm not a sports person.                                           |
| If I sign up, I'll have to drive all the way over there.           |
| It won't cost me any working time.                                 |
| After all, it's free of charge.                                    |
| This is a course where it's up to me what I do or what I don't do. |
| I get so much exercise anyway.                                     |
| I have an elevated risk, so I have to do something about it.       |
| The doctor says it's necessary for me to do this.                  |
